# Supplementary material
Source: PubMed Central journal article supplement (PMC3201791)
Supplement: NIHMS135777-supplement-1_si_001.pdf [file NIHMS135777-supplement-1_si_001.pdf]

Supporting Information for

Proton-Coupled Electron Transfer of Ruthenium(III)-  
Pterin Complexes: A Mechanistic Insight

**Soushi Miyazaki,<sup>†</sup> Takahiko Kojima,<sup>\*,†,‡</sup> James M. Mayer,<sup>\*,§</sup> and Shunichi Fukuzumi<sup>\*,†</sup>**

*Contribution from Department of Material and Life Science, Graduate School of Engineering, Osaka University, and SORST (JST), 2-1 Yamada-oka, Suita, Osaka 565-0871, Japan, and Department of Chemistry, Campus Box 351700, the University of Washington, Seattle, Washington 98195-1700*

E-mail: kojima@chem.tsukuba.ac.jp (T. K.), mayer@chem.washington.edu (J. M. M.) and  
fukuzumi@chem.eng.osaka-u.ac.jp

<sup>†</sup> Osaka University

<sup>‡</sup> Present address: Department of Chemistry, Graduate School of Pure and Applied Sciences, University of Tsukuba, Tennou-dai, Tsukuba, Ibaraki 305-8571, Japan.

<sup>§</sup> University of Washington

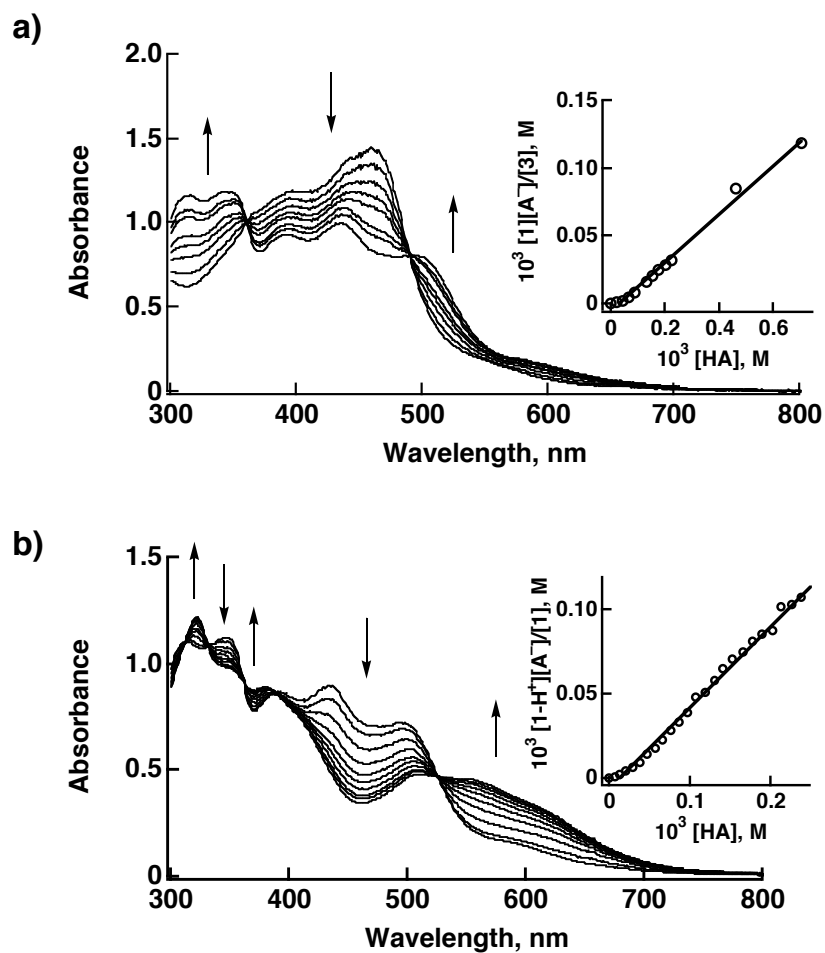

**Figure S1.** (a) UV-Vis spectral change for the first protonation step of **3** upon addition of HClO<sub>4</sub>. Insets are plot of  $[1][A]/[3]$  vs.  $[HA]$  ( $HA = 2,6\text{-dichlorobenzoic acid}$ ). (b) For the second protonation step of **3** upon addition of HClO<sub>4</sub> for **1**. Insets are plot of  $[1-H^+][A]/[1]$  vs.  $[HA]$  ( $HA = HClO_4$ ).

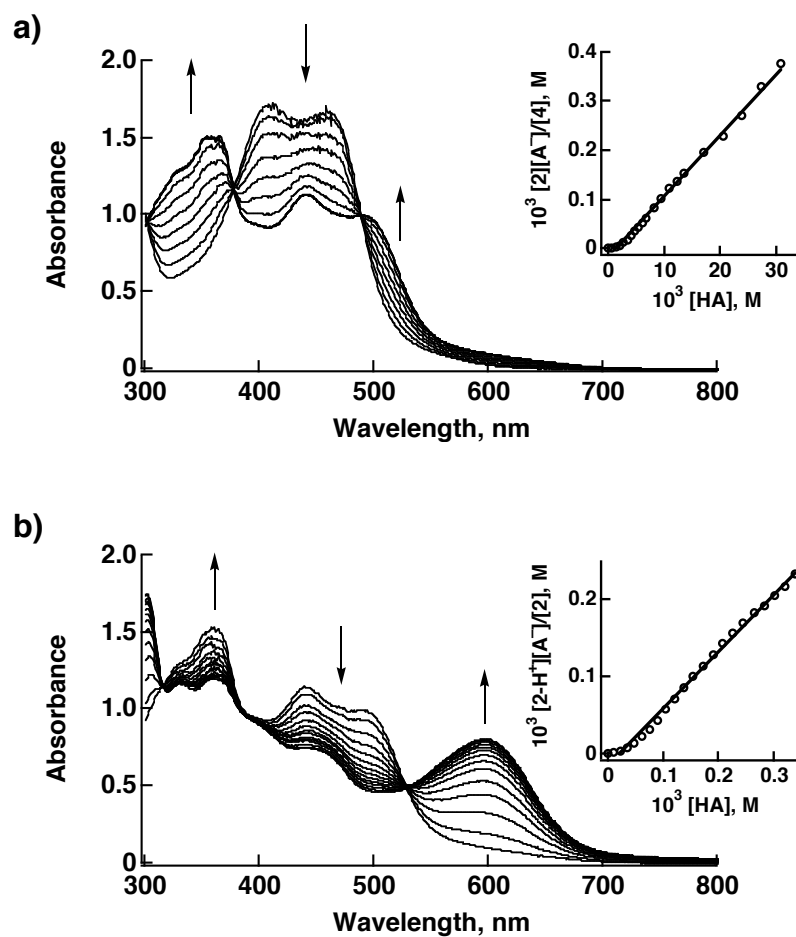

**Figure S2.** (a) UV-Vis spectral change for the first protonation step of **4** upon addition of  $\text{HClO}_4$ . Insets are plot of  $[2][A]/[4]$  vs.  $[HA]$  ( $HA = 2,6\text{-dichlorobenzoic acid}$ ). (b) For the second protonation step upon addition of  $\text{HClO}_4$  for **4**. Insets are plot of  $[2\text{-H}^+][A]/[2]$  vs.  $[HA]$  ( $HA = \text{HClO}_4$ ).

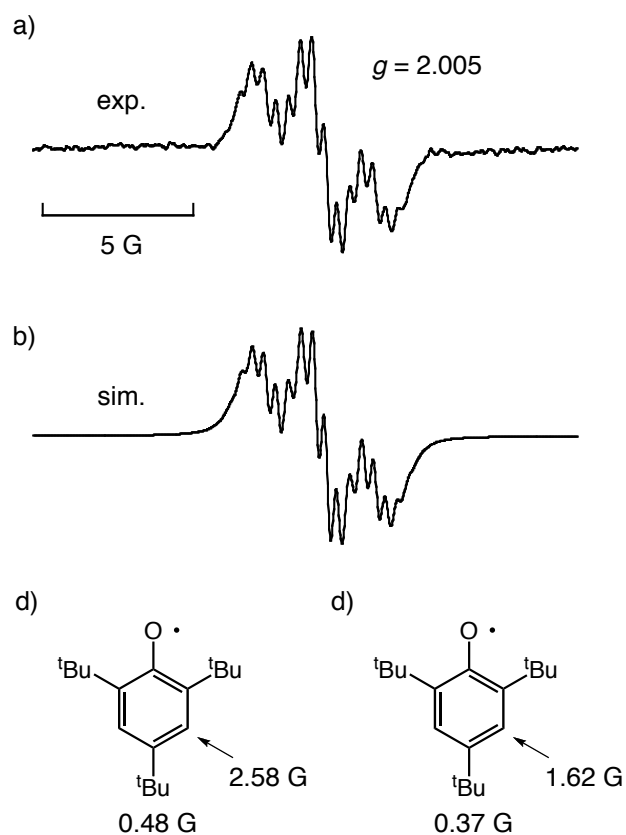

**Figure S3.** a) Experimental ESR spectrum of 2,4,6-tri-*tert*-butyl phenoxyl radical obtained by the hydrogen atom transfer reaction from 2,4,6-tri-*tert*-butyl phenol to  $[\text{Ru}^{\text{III}}(\text{dmp})(\text{TPA})]^{2+}$ . b) The computer simulation spectrum with  $\Delta H_{\text{msl}} = 1.4$  G. c) Hyperfine coupling constant based on spin density obtained by DFT calculation. d) The hyperfine coupling constants used for the simulation. Values are given in gauss.

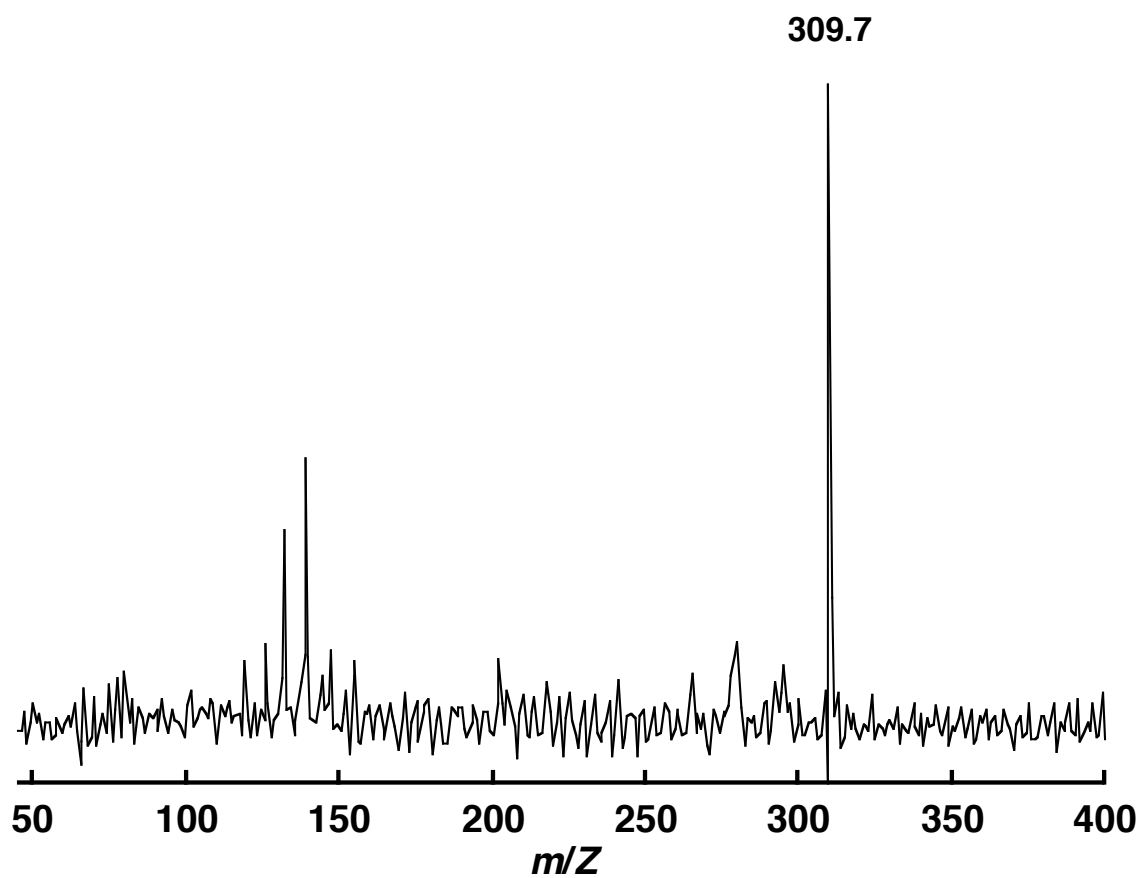

**Figure S4.** The mass spectrum of reaction mixture obtained by the reaction of 4-nitrophenol with  $[\text{Ru}^{\text{III}}(\text{dmp})(\text{TPA})]^{2+}$  in MeCN.
